# Supplementary material for: Mitogen-Activated Protein Kinase Is Involved in Salt Stress Response in Tomato (Solanum lycopersicum) Seedlings
Source: MDPI journal article supplement (doi:10.3390/ijms23147645), 2022-07-11
Supplement: s1 [file s1]

Table S1 Quality statistics of transcriptome.

| Sample    | Raw reads | Clean reads | Clean bases | Error rate | Q20   | Q30   | GCpct |
|-----------|-----------|-------------|-------------|------------|-------|-------|-------|
| Control 1 | 51166330  | 50308986    | 7.55G       | 0.03       | 97.73 | 93.4  | 42.97 |
| Control 2 | 51423804  | 50581532    | 7.59G       | 0.03       | 97.79 | 93.58 | 42.99 |
| Control 3 | 52427908  | 51445114    | 7.72G       | 0.03       | 97.27 | 92.4  | 43.13 |
| NaCl 1    | 55034310  | 54136256    | 8.12G       | 0.03       | 97.77 | 93.51 | 42.77 |
| NaCl 2    | 56240960  | 55303674    | 8.3G        | 0.03       | 97.69 | 93.39 | 42.85 |
| NaCl 3    | 45997542  | 44587798    | 6.69G       | 0.03       | 97.94 | 93.89 | 42.65 |
